# Supplementary material for: The honeybee (Apis mellifera) developmental state shapes the genetic composition of the deformed wing virus-A quasispecies during serial transmission
Source: PubMed Central journal article supplement (PMC7136270; doi:10.1038/s41598-020-62673-w), 2020-04-06
Supplement: 41598_2020_62673_MOESM1_ESM.pdf [file 41598_2020_62673_MOESM1_ESM.pdf]

**The honeybee (*Apis mellifera*) developmental state shapes the genetic composition of the deformed wing virus-A quasispecies during serial transmission**

Orlando Yañez<sup>1</sup>, Julio Chávez-Galarza<sup>2,3</sup>, Christian Tellgren-Roth<sup>4</sup>, M. Alice Pinto<sup>2</sup>, Peter Neumann<sup>1</sup>, Joachim R. de Miranda<sup>5\*</sup>

**Supplementary Files**

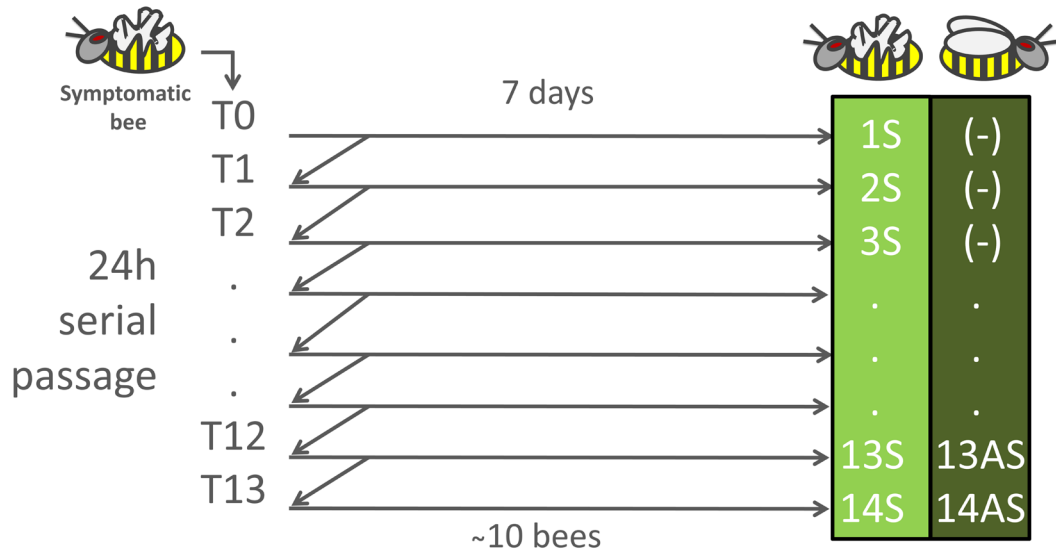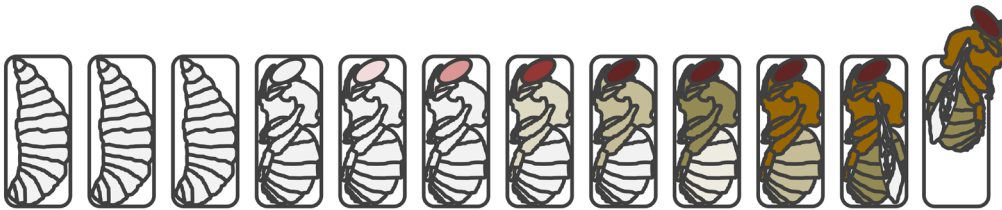

**Supplementary Figure S1 | Serial transmission design.** Experimental design outlining the organization of the serial transmission experiments relative to the bee pupal developmental phase (bottom), inoculating at the pink-eye stage, removing one pupa 24 hours later for preparing the inoculum for the next serial transfer and leaving the remaining pupae to complete development into either symptomatic (S; light green) or asymptomatic (AS; dark green) adults. T1-T13 refer to the number of the serial transfers from the original inoculum (T0).

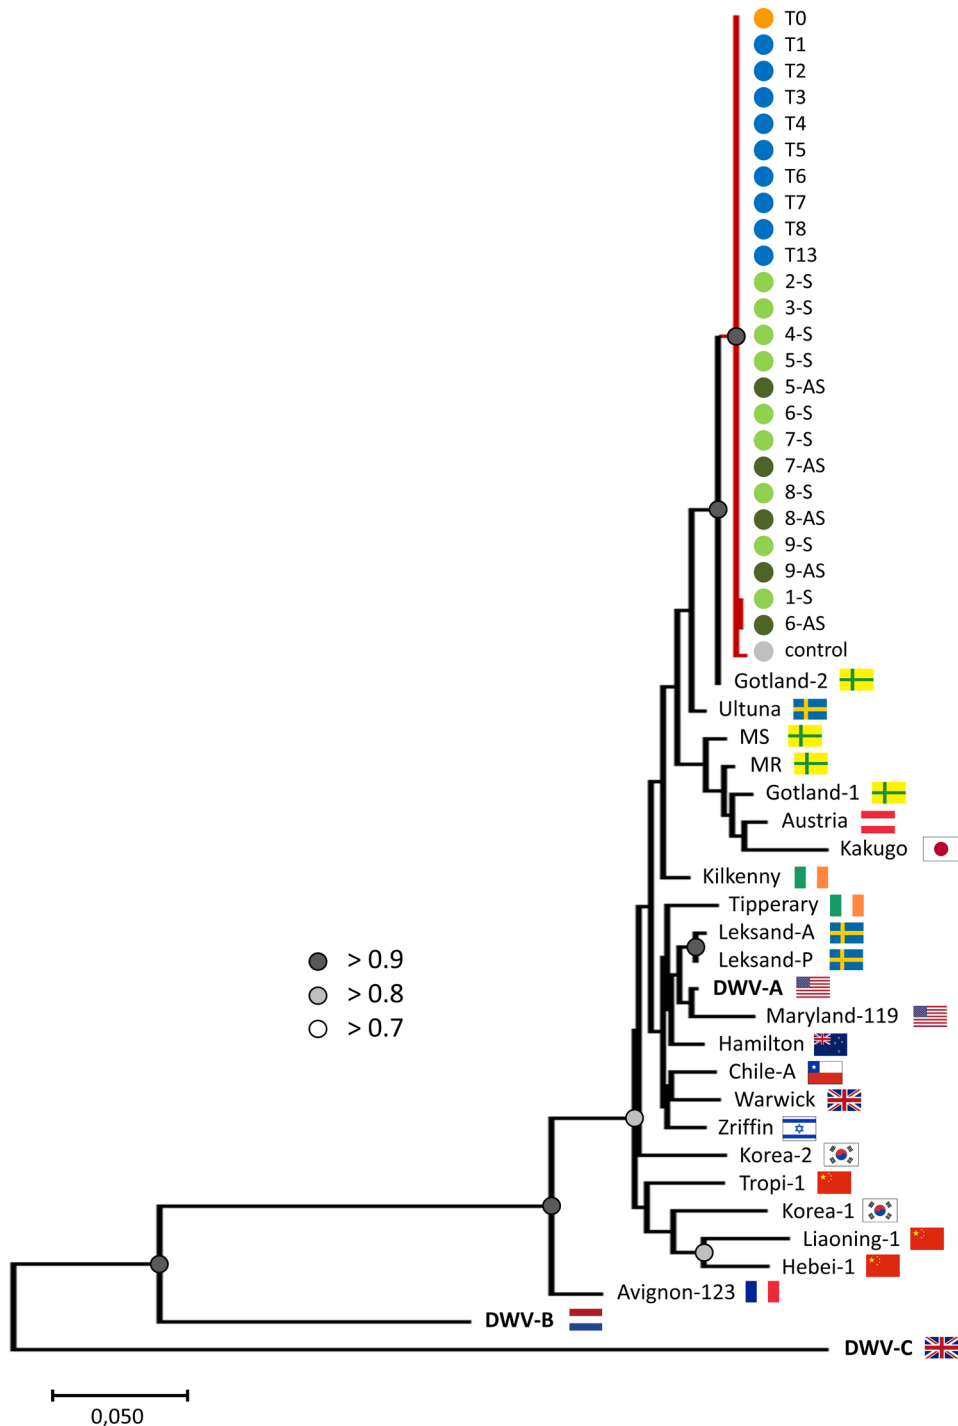

### Supplementary Figure S2 | DWV phylogenetic relationships VIVA isolates

Reconstruction of the phylogenetic relationships between the DWV isolates of the current study to other Swedish isolates and a selection of international biogeographic isolates, based on the nucleotide sequence of the DWV Lp gene<sup>14</sup>. The relationships were inferred using the Maximum Likelihood method and the Tamura-Nei model of evolution<sup>101</sup>, as implemented by MEGA-X<sup>83</sup>. The tree with the highest log likelihood (-3998,32) is shown. The statistical confidence of each of the nodes was determined by bootstrap analysis involving 500 replicates. Nodes with >70%, >80% and >90% probability are represented by open, shaded and closed circles respectively. Nodes with <70% probability are unmarked. The tree is drawn to scale, with branch lengths measured in the number of substitutions per site. The geographic origins of the isolates are indicated by flags. The accession number, geographic origin, year of isolation and original reference of the sequences used in the analyses are given in Supplementary Table 2.

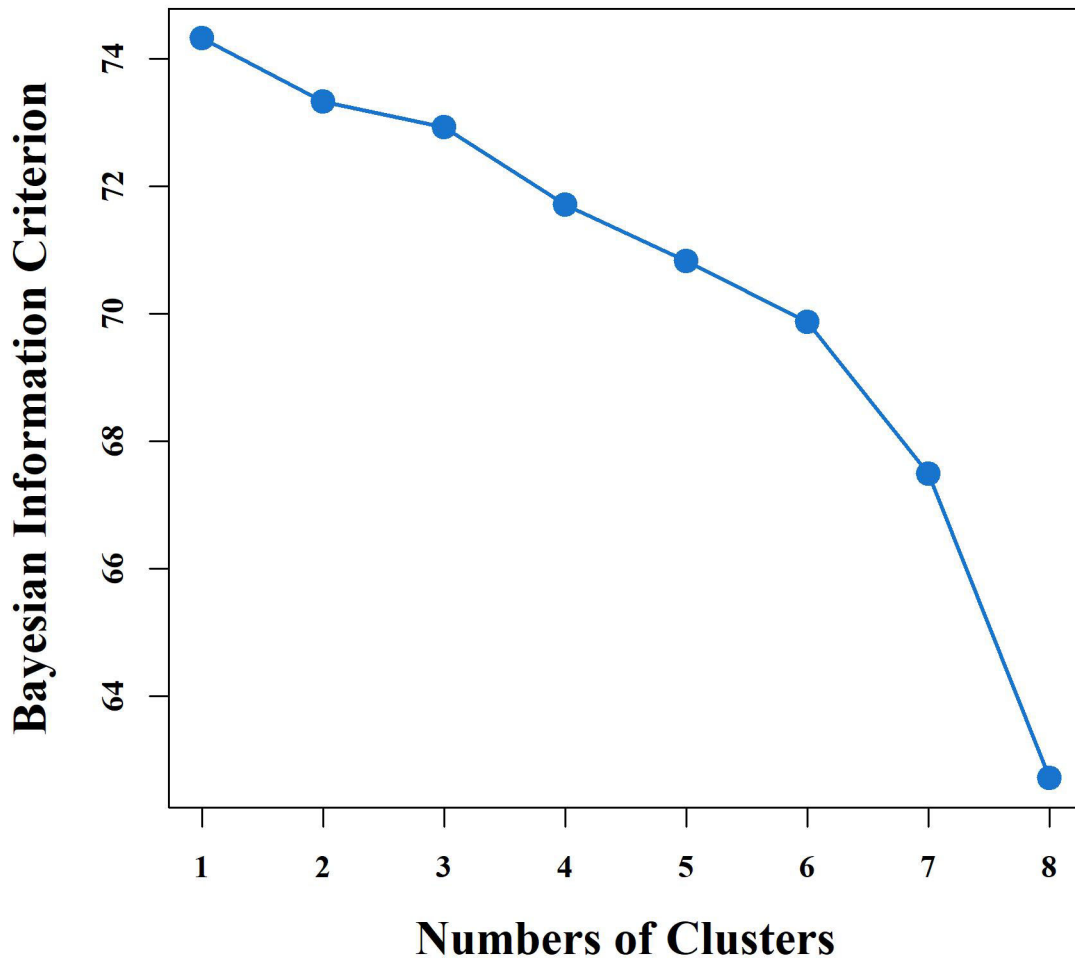

**Supplementary Figure S3 | K-means genetic clusters determination.** Optimum number of K-means genetic clusters among different groups of DWV quasispecies, as determined by Bayesian Information Criteria (BIC), for the serial transmission inocula presented in Figure 3D.

| Purpose                            | Target <sup>(ref)</sup> | Primers                | Sequence (5' to 3')      | Size (nt) |
|------------------------------------|-------------------------|------------------------|--------------------------|-----------|
| Background virus analyses          | DWV <sup>(23)</sup>     | DWV-F8668              | TTCATTAAGCCACCTGGAACATC  | 136       |
|                                    |                         | DWV-B8757              | TTTCCTCATTAAGTGTGCGTTGA  |           |
|                                    | ABPV <sup>(23)</sup>    | ABPV-F6548             | TCATACCTGCCGATCAAG       | 197       |
|                                    |                         | KIABPV-B6707           | CTGAATAAATACTGTGCGTATC   |           |
|                                    | BQCV <sup>(23)</sup>    | BQCV-qF7893            | AGTGCGGAGATGTATGC        | 294       |
|                                    |                         | BQCV-qB8150            | GGAGGTGAAGTGGCTATATC     |           |
|                                    | IAPV <sup>(23)</sup>    | IAPV-F6627             | CCATGCCTGGCGATTAC        | 203       |
|                                    |                         | KIABPV-B6707           | CTGAATAAATACTGTGCGTATC   |           |
|                                    | SBV <sup>(23)</sup>     | SBV-qF3164             | TTGGAACACGCATTCTCTG      | 335       |
|                                    |                         | SBV-qB3461             | GCTCTAACCTCGCATCAAC      |           |
| SBPV <sup>(23)</sup>               | SBPV-F3177              | GCGCTTTAGTTCAATTGCC    | 226                      |           |
|                                    | SBPV-B3363              | ATTATAGGACGTGAAAATATAC |                          |           |
| VDV-1 <sup>(23)</sup>              | VDV-F1409               | GCCCTGTTCAAGAACATG     | 413                      |           |
|                                    | DWV-B1806               | CTTTTCTAATTCAACTCACC   |                          |           |
| β-actin-iso2 <sup>(23)</sup>       | Am-actin2-qF            | CGTGCCGATAGTATTCTTG    | 271                      |           |
|                                    | Am-actin2-qB            | CTTCGTCACCAACATAGG     |                          |           |
| Whole genome amplification         | DWV                     | DWV-F27                | CATAGCGAATTACGGTGC       | 1817      |
|                                    |                         | DWV-B1806              | CTTTTCTAATTCAACTCACC     |           |
|                                    | DWV                     | DWV-F1725              | GATTACGAGTTAGAGTGTG      | 1407      |
|                                    |                         | DWV-B3095              | GCTATTACTTTCTGTAAATC     |           |
|                                    | DWV                     | DWV-F3018              | GTAGGTTAATTGTAGGTTATG    | 4317      |
|                                    |                         | DWV-B7295              | ACGCAGTTATACCAATTATAC    |           |
| DWV                                | DWV-F7243               | CCCGTGAAAATGATTCGTG    | 2897                     |           |
|                                    | DWV-B10101              | ACTATACTAAAATTAGGACGC  |                          |           |
| Supplementary genome amplification | DWV <sup>(37)</sup>     | DWV-F1153              | ATTA AAAAATGGCCTTTAGTTG  | 694       |
|                                    |                         | DWV-B1806              | CTTTTCTAATTCAACTCACC     |           |
|                                    | DWV                     | DWV-F3018              | GTAGGTTAATTGTAGGTTATG    | 1355      |
|                                    |                         | DWV-B4329              | CAATTCTATAACATTATTTACACG |           |
|                                    | DWV                     | DWV-F4220              | TTTGGGTACAACATCGACC      | 1485      |
|                                    |                         | DWV-B5668              | CACACTGATCCCAATAATC      |           |
|                                    | DWV                     | DWV-F5625              | ACGTGCGAGTCGTA CT C      | 1706      |
|                                    |                         | DWV-B7295              | ACGCAGTTATACCAATTATAC    |           |
|                                    | DWV                     | DWV-F7243              | CCCGTGAAAATGATTCGTG      | 1588      |
|                                    |                         | DWV-B8794              | CCGTGAATATAGTGTGAGG      |           |
| DWV                                | DWV-F8688               | GGTAAGCGATGGTTGTTTG    | 1451                     |           |
|                                    | DWV-B10101              | ACTATACTAAAATTAGGACGC  |                          |           |

**Supplementary Table S1. PCR primers used for virus quantification, DWV genome amplification and DI genome analyses.** Shown are the purpose of the assay, the target virus (and the reference for the assay), the primer name and sequences and the size of the amplicon. Except where indicated, the assays were developed during this work.

| Isolate <sup>(ref)</sup>     | Accession    | Year | Region                      |
|------------------------------|--------------|------|-----------------------------|
| Leksand-P <sup>(37)</sup>    | JF346656     | 2008 | Dalarna, Sweden             |
| Leksand-A <sup>(37)</sup>    | JF346657     | 2008 | Dalarna, Sweden             |
| Ultuna <sup>(14)</sup>       | JF346553     | 2006 | Uppland, Sweden             |
| Gotland-1 <sup>(14)</sup>    | JF346577     | 2006 | Gotland, Sweden             |
| Gotland-2 <sup>(14)</sup>    | JF346558     | 2006 | Gotland, Sweden             |
| MR <sup>(93)</sup>           | MH267695     | 2009 | Gotland, Sweden             |
| MS <sup>(93)</sup>           | MH267696     | 2009 | Gotland, Sweden             |
| Austria <sup>(95)</sup>      | KU847397     | 2012 | Vienna, Austria             |
| Kakugo <sup>(97)</sup>       | AB070959     | 1999 | Chiba, Japan                |
| Tipperary <sup>(14)</sup>    | JF346636     | 2007 | Tipperary, Ireland          |
| Kilkenny <sup>(14)</sup>     | JF346635     | 2007 | Kilkenny, Ireland           |
| Maryland-119 <sup>(34)</sup> | MH069506     | 2015 | Maryland, USA               |
| Hamilton <sup>(26)</sup>     | MF623172     | 2015 | Hamilton, New Zealand       |
| Chile-A <sup>(96)</sup>      | JQ413340     | 2011 | Chile, South America        |
| Warwick <sup>(20)</sup>      | GU109335     | 2009 | Warwickshire, England       |
| Zriffin <sup>(58)</sup>      | JF440526     | 2008 | Bet Dagan, Israel           |
| Korea-1 <sup>(98)</sup>      | JX878304     | 2012 | Gyeonggi, South Korea       |
| Korea-2 <sup>(98)</sup>      | JX878305     | 2012 | Gyeonggi, South Korea       |
| Tropi-1 <sup>(99)</sup>      | JF346640     | 2007 | Hainan, China               |
| Liaoning-1 <sup>(100)</sup>  | MF770715     | 2017 | Liaoning, China             |
| Hebei-1 <sup>(100)</sup>     | MH165180     | 2018 | Hebei, China                |
| Avignon-123 <sup>(32)</sup>  | KX373900     | 2013 | Avignon, France             |
| DWV-A <sup>(94)</sup>        | AY292384     | 2000 | Pennsylvania, USA           |
| DWV-B <sup>(48)</sup>        | AY251269     | 2001 | Gelderland, The Netherlands |
| DWV-C <sup>(33)</sup>        | CEND01000001 | 2006 | Devon, England              |

**Supplementary Table S2. Sequences used in the phylogenetic analyses of Swedish DWV isolates.** Shown are the name of the isolate, including the original reference, the accession number, the year of isolation and the region where the isolate was found.
